# Supplementary material for: Attenuation of Zika Virus by Passage in Human HeLa Cells
Source: PubMed Central journal article supplement (PMC6789458; doi:10.3390/vaccines7030093), 2019-08-20
Supplement: vaccines-07-00093-s001.pdf [file vaccines-07-00093-s001.pdf]

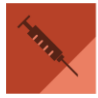

# Attenuation of Zika Virus by Passage in Human HeLa Cells

Li Li <sup>1</sup>, Natalie D. Collins <sup>2,3</sup>, Steven G. Widen <sup>4</sup>, Emily H. Davis <sup>1</sup>, Jaclyn A. Kaiser <sup>2</sup>, Mellodee M. White <sup>5</sup>, M. Banks Greenberg <sup>5</sup>, Alan D.T. Barrett <sup>1,6,7</sup>, Nigel Bourne <sup>2,5,6,7</sup>, Vanessa V. Sarathy <sup>1,6,7,\*</sup>

<sup>1</sup> Department of Pathology, University of Texas Medical Branch, Galveston, TX 77555, USA; [lili@utmb.edu](mailto:lili@utmb.edu) (L.L.); [emidavis@utmb.edu](mailto:emidavis@utmb.edu) (E.H.D.); [abarrett@utmb.edu](mailto:abarrett@utmb.edu) (A.D.T.B.)

<sup>2</sup> Department of Microbiology and Immunology, University of Texas Medical Branch, Galveston, TX 77555, USA; [natalie.d.collins.mil@mail.mil](mailto:natalie.d.collins.mil@mail.mil) (N.D.C.); [jakaiser@utmb.edu](mailto:jakaiser@utmb.edu) (J.A.K.); [nibourne@utmb.edu](mailto:nibourne@utmb.edu) (N.B.)

<sup>3</sup> Viral Disease Branch, Walter Reed Army Institute for Research, Silver Spring, MD 20910, USA

<sup>4</sup> Department of Biochemistry and Molecular Biology, University of Texas Medical Branch, Galveston, TX 77555, USA; [sgwiden@utmb.edu](mailto:sgwiden@utmb.edu) (S.G.W.)

<sup>5</sup> Department of Pediatrics, University of Texas Medical Branch, Galveston, TX 77555, USA; [m3white@utmb.edu](mailto:m3white@utmb.edu) (M.M.W.); [mbgreenb@utmb.edu](mailto:mbgreenb@utmb.edu) (M.B.G.)

<sup>6</sup> Sealy Institute for Vaccine Sciences, University of Texas Medical Branch, Galveston, TX 77555, USA

<sup>7</sup> Institute for Human Infections and Immunity, University of Texas Medical Branch, Galveston, TX 77555, USA

\* Correspondence: [vvsarath@utmb.edu](mailto:vvsarath@utmb.edu); Tel.: 01-409-747-2403

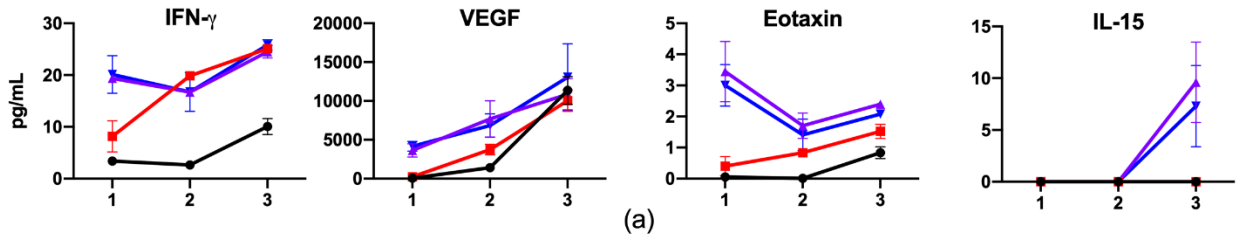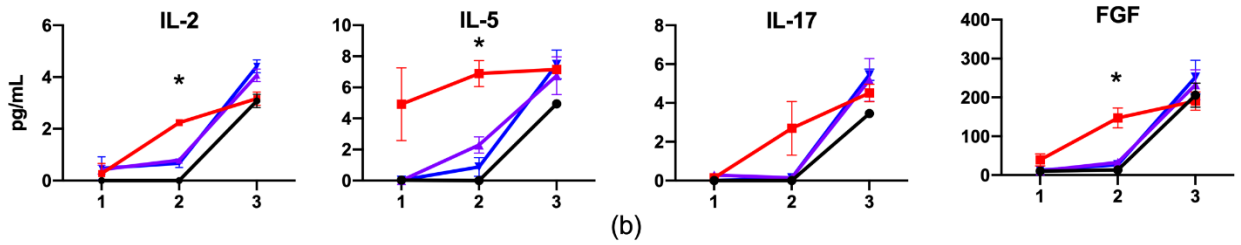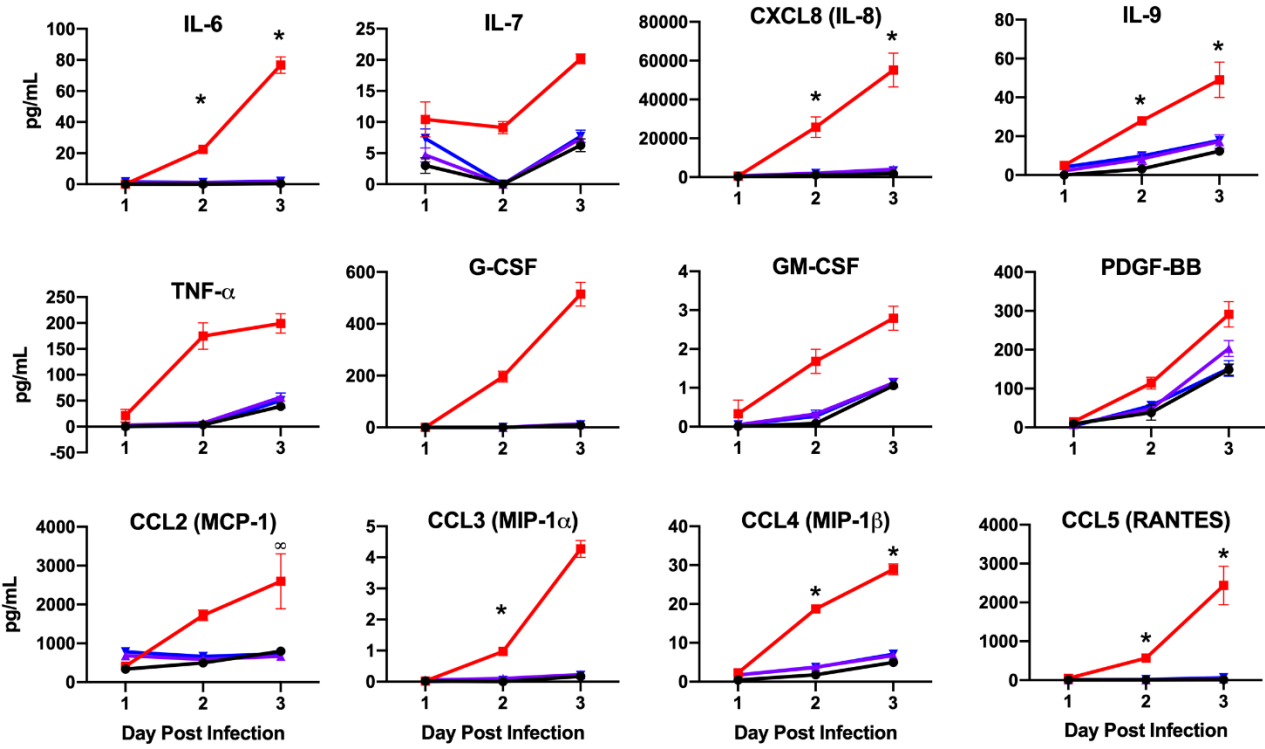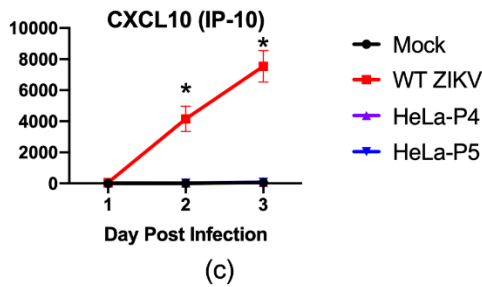

**Figure S1.** Passaging of ZIKV in HeLa cells attenuates cytokine production in A549 epithelial cells. Secreted cytokine levels from A549 cells infected with WT ZIKV, HeLa-P4, HeLa-P5, or mock at 1, 2, or 3 days p.i. were quantified from 50 microliter samples ( $n = 2$ ). (a) Cytokine and chemokine levels increased on day 1, 2, or 3 following infection with HeLa-P4 and HeLa-P5 but not with WT ZIKV; (b) Cytokines and chemokines increased by infection with WT ZIKV on day 2 p.i. or (c) on days 2 and 3 p.i. Not shown: IL-1 $\beta$ , IL-4, IL-12p70, and IL-13 were detected at very low levels ( $< 2$  pg/mL); IL-1RA and IL-10 were not detected in any samples. Kruskal-Wallis tests with Dunn's multiple comparisons were used to compare WT ZIKV, HeLa-P4, and HeLa-P5 to mock and to compare mock, HeLa-P4, and HeLa-P5 to WT ZIKV. Error bars represent standard deviation.  $*p < 0.05$  WT ZIKV compared to mock;  $\infty p < 0.05$  WT ZIKV compared to HeLa-P4 or HeLa-P5. No differences were detected between HeLa-P4 and HeLa-P5 induction of cytokines.
